# Supplementary material for: Construction of Vero cell-adapted rabies vaccine strain by five amino acid substitutions in HEP-Flury strain
Source: PubMed Central journal article supplement (PMC11143356; doi:10.1038/s41598-024-63337-9), 2024-05-31
Supplement: 41598_2024_63337_MOESM1_ESM.pdf [file 41598_2024_63337_MOESM1_ESM.pdf]

**Title: Construction of Vero cell-adapted rabies vaccine strain by five amino acid substitutions in HEP-Flury strain**

Authors:

Michiko Harada<sup>1,2</sup>, Aya Matsuu<sup>2</sup>, Eun-Sil Park<sup>2</sup>, Yusuke Inoue<sup>1,2</sup>, Akihiko Uda<sup>2</sup>, Yoshihiro Kaku<sup>2</sup>, Akiko Okutani<sup>2</sup>, Guillermo Posadas-Herrera<sup>2</sup>, Keita Ishijima<sup>2</sup>, Satoshi Inoue<sup>2</sup>, Ken Maeda<sup>1,2\*</sup>

Author affiliations:

<sup>1</sup>Joint Graduate School of Veterinary Medicine, Yamaguchi University, Yamaguchi, Yamaguchi, Japan.

<sup>2</sup>Department of Veterinary Science, National Institute of Infectious Diseases, Shinjuku-ku, Tokyo, Japan.

\*Corresponding Author:

Ken Maeda, DVM, PhD

ORCID: 0000-0002-3488-5439

1-23-1 Toyama, Shinjuku-ku, Tokyo 162-8640, Japan

Tel: +81-3-4582-2750

Email: [kmaeda@niid.go.jp](mailto:kmaeda@niid.go.jp)

**Supplementary Table S1. Comparison of amino acid sequences between our laboratory's HEP-Flury (HEP) strain and those previously reported for HEP-Flury strains**

| Strain         | P  |     |     |     |     | M  |     |     | G (signal peptide) |    | G** |     |     |     |     |     |     |     |     | L  |     |     |      |      |      |      |   |
|----------------|----|-----|-----|-----|-----|----|-----|-----|--------------------|----|-----|-----|-----|-----|-----|-----|-----|-----|-----|----|-----|-----|------|------|------|------|---|
|                | 28 | 130 | 191 | 289 | 295 | 16 | 106 | 172 | 14                 | 15 | 40  | 120 | 164 | 206 | 236 | 259 | 273 | 484 | 504 | 75 | 383 | 745 | 1319 | 1653 | 1848 | 2091 |   |
| HEP (LC785439) | I  | S   | G   | D   | T   | T  | A   | D   | F                  | P  | G   | H   | V   | T   | M   | N   | E   | P   | R   | D  | L   | Q   | R    | V    | R    | R    |   |
| AB085828       | *  | *   | *   | *   | *   | *  | *   | *   | S                  | *  | *   | *   | *   | *   | *   | *   | *   | *   | *   | *  | *   | *   | *    | *    | *    | *    | * |
| LC717409       | *  | T   | E   | *   | *   | *  | *   | N   | *                  | *  | *   | *   | *   | *   | *   | *   | V   | T   | *   | *  | *   | *   | *    | *    | *    | *    |   |
| GU565704       | *  | T   | E   | *   | K   | *  | V   | N   | *                  | S  | *   | *   | *   | *   | *   | *   | V   | T   | *   | G  | S   | *   | *    | *    | *    | S    |   |
| LC717410       | *  | T   | E   | *   | *   | *  | V   | N   | *                  | *  | *   | *   | *   | I   | *   | *   | V   | T   | I   | *  | S   | *   | *    | *    | *    | *    |   |
| LC717411       | V  | T   | E   | *   | *   | *  | V   | N   | *                  | *  | *   | *   | E   | I   | V   | D   | V   | T   | I   | *  | S   | *   | K    | I    | *    | *    |   |
| LC717412       | V  | T   | E   | N   | *   | I  | V   | N   | *                  | *  | R   | V   | E   | I   | V   | D   | V   | T   | I   | *  | S   | R   | K    | *    | K    | *    |   |

\*: Amino acid identical with our laboratory HEP.

\*\* : Position of amino acids in the mature G protein without the signal peptide.

Supplemental Table S2. Comparison of virus titers between HEP-Flury (HEP) and Vero-adapted HEP-Flury strains

| Days post infection | Virus titers ( $\log_{10}$ FFU/ml) (Mean $\pm$ S.D.) |                 |                 |
|---------------------|------------------------------------------------------|-----------------|-----------------|
|                     | HEP                                                  | HEP-10V         | HEP-30V         |
| 1                   | 3.15 $\pm$ 0.99                                      | 3.91 $\pm$ 0.29 | 4.48 $\pm$ 0.42 |
| 2                   | 4.47 $\pm$ 0.83                                      | 5.76 $\pm$ 0.11 | 6.54 $\pm$ 0.45 |
| 3                   | 4.87 $\pm$ 0.93                                      | 6.25 $\pm$ 0.30 | 7.14 $\pm$ 0.41 |
| 4                   | 4.82 $\pm$ 0.99                                      | 6.75 $\pm$ 0.19 | 7.79 $\pm$ 0.07 |

Supplemental Table S3. Comparison of virus titers among recombinant HEP-Flury strains to evaluate the effect of mutations in HEP-10V

| Days post<br>infection | Virus titers (log <sub>10</sub> FFU/ml) (Mean±S.D.) |             |             |             |               |               |               |           |
|------------------------|-----------------------------------------------------|-------------|-------------|-------------|---------------|---------------|---------------|-----------|
|                        | rHEP                                                | rHEP-10V(P) | rHEP-10V(G) | rHEP-10V(L) | rHEP-10V(P,G) | rHEP-10V(P,L) | rHEP-10V(G,L) | rHEP-10V  |
| 1                      | 3.03±0.55                                           | 4.81±0.48   | 3.28±0.45   | 2.83±0.46   | 5.04±0.36     | 4.77±0.21     | 3.10±0.39     | 5.25±0.30 |
| 2                      | 4.08±0.68                                           | 5.96±0.31   | 4.43±0.35   | 3.89±0.63   | 6.35±0.43     | 5.75±0.40     | 4.45±0.36     | 6.47±0.36 |
| 3                      | 4.28±0.67                                           | 6.39±0.37   | 4.88±0.36   | 4.16±0.72   | 6.85±0.32     | 6.23±0.34     | 4.73±0.31     | 6.90±0.32 |
| 4                      | 4.23±0.64                                           | 6.47±0.42   | 5.07±0.53   | 4.21±0.70   | 7.13±0.34     | 6.31±0.36     | 4.78±0.29     | 7.16±0.33 |

Supplemental Table S4. Comparison of virus titers of the rHEP-10V to evaluate the effect of mutations on the G or L proteins in rHEP-30V

| Days post<br>infection | Virus titers ( $\log_{10}$ FFU/ml) (Mean $\pm$ S.D.) |                 |                 |                 |
|------------------------|------------------------------------------------------|-----------------|-----------------|-----------------|
|                        | rHEP-10V                                             | rHEP-10V+G3     | rHEP-10V+L1     | rHEP-30V        |
| 1                      | 5.35 $\pm$ 0.37                                      | 5.69 $\pm$ 0.10 | 5.13 $\pm$ 0.26 | 6.00 $\pm$ 0.09 |
| 2                      | 6.92 $\pm$ 0.36                                      | 7.64 $\pm$ 0.39 | 6.87 $\pm$ 0.23 | 7.90 $\pm$ 0.37 |
| 3                      | 7.83 $\pm$ 0.57                                      | 8.31 $\pm$ 0.06 | 7.66 $\pm$ 0.18 | 8.40 $\pm$ 0.32 |
| 4                      | 7.96 $\pm$ 0.31                                      | 8.57 $\pm$ 0.09 | 7.88 $\pm$ 0.31 | 8.65 $\pm$ 0.16 |

Supplemental Table S5. Comparison of virus titers among rHEP-10 with the substitutions in rHEV-30V

| Days post infection | Virus titers (log <sub>10</sub> FFU/ml) (Mean±S.D.) |                |                |                |                       |                       |                       |             |           |
|---------------------|-----------------------------------------------------|----------------|----------------|----------------|-----------------------|-----------------------|-----------------------|-------------|-----------|
|                     | rHEP-10V                                            | rHEP-10V+V164E | rHEP-10V+L183P | rHEP-10V+A286V | rHEP-10V+V164E, L183P | rHEP-10V+V164E, A286V | rHEP-10V+L183P, A286V | rHEP-10V+G3 | rHEP-30V  |
| 1                   | 4.69±0.13                                           | 4.61±0.05      | 4.35±0.20      | 4.58±0.17      | 4.5±0.14              | 5.12±0.10             | 4.26±0.03             | 5.14±0.25   | 5.23±0.31 |
| 2                   | 6.14±0.14                                           | 6.21±0.15      | 5.89±0.19      | 6.21±0.08      | 6.16±0.04             | 6.68±0.11             | 5.96±0.15             | 6.86±0.08   | 7.08±0.08 |
| 3                   | 6.91±0.09                                           | 6.96±0.14      | 6.70±0.27      | 6.97±0.20      | 7.04±0.19             | 7.40±0.14             | 6.86±0.05             | 7.68±0.22   | 7.84±0.05 |
| 4                   | 7.24±0.10                                           | 7.41±0.20      | 7.00±0.21      | 7.13±0.14      | 7.49±0.17             | 7.72±0.13             | 7.28±0.06             | 7.93±0.11   | 8.13±0.23 |

Supplemental Table S6. Comparison of virus titers of the rHEP-PG4 with only five substitutions

| Days post<br>infection | Virus titers ( $\log_{10}$ FFU/ml) (Mean $\pm$ S.D.) |                 |                 |                 |                 |
|------------------------|------------------------------------------------------|-----------------|-----------------|-----------------|-----------------|
|                        | rHEP                                                 | rHEP-10V        | rHEP-10V+G3     | rHEP-PG4        | rHEP-30V        |
| 1                      | 3.31 $\pm$ 0.15                                      | 5.50 $\pm$ 0.14 | 5.75 $\pm$ 0.18 | 5.77 $\pm$ 0.22 | 6.06 $\pm$ 0.15 |
| 2                      | 4.28 $\pm$ 0.31                                      | 6.69 $\pm$ 0.20 | 7.28 $\pm$ 0.16 | 7.25 $\pm$ 0.05 | 7.62 $\pm$ 0.14 |
| 3                      | 4.43 $\pm$ 0.08                                      | 7.10 $\pm$ 0.17 | 7.89 $\pm$ 0.10 | 7.91 $\pm$ 0.10 | 8.13 $\pm$ 0.08 |
| 4                      | 4.35 $\pm$ 0.25                                      | 7.42 $\pm$ 0.22 | 7.99 $\pm$ 0.12 | 8.12 $\pm$ 0.11 | 8.12 $\pm$ 0.03 |

Supplementary Table S7. Primers used for sequence analysis.

| Primer | Forward primer (5'–3')      | Position* | Reverse primer (5'–3')      | Position*   |
|--------|-----------------------------|-----------|-----------------------------|-------------|
| RABV1  | ACAGACAGCGTCAATTGCAAAGC     | 28–50     | TTGACGAAGATCTTGCTCAT        | 1533–1514   |
| RABV2  | CTTCCGTTCAGTAGGCTTGAGTGGG   | 934–958   | GGRGGTGGAAAGCCACARGTCATCG   | 2602–2579   |
| RABV3  | TGATCTATCAGTRGAGGCTGAGATCGC | 2092–2118 | CTGAAGAGACATGTCAGACCATAG    | 3056–3033   |
| RABV4  | ATGRCGATGACYTGTGGCTTCCACC   | 2575–2599 | CCCATGTTCCATCCATAAGTCTAAG   | 4095–4071   |
| RABV5  | TATCCCGCAAGTTCATCACT        | 3113–3132 | AGTTTGGCAGAGTCCTCAATC       | 5556–5536   |
| RABV6  | GGGTTTGAAAAGCATATACCATATTC  | 4302–4328 | GACTTGGAATAGAAATGGGCCAAGTC  | 5790–5765   |
| RABV7  | TGTCCCCAACATCTTGAGGAACTC    | 5488–5510 | CGCATTGGTGGATACTGTAGA       | 7912–7892   |
| RABV8  | TACTAGCTCAAGGAGACAACCAGGT   | 7581–7605 | TGAACCAGTTTATAGATTCTTTTAACG | 9017–8991   |
| RABV9  | TCAGAGTTTCGAGAGGCAATCCTG    | 8399–8422 | AGCTGCATGGCGCACCTCTTGATC    | 10249–10226 |
| RABV10 | CAGCTCAGGGGCTCTTATACTCAATC  | 9555–9580 | CCAGAGGTTCGGATTCAAGA        | 11880–11861 |

\*: The positions of the primer locations were defined based on the newly amplified genomic sequence of HEP using these primer sets.



Supplementary Table S8. Primers used for construction of infectious clones.

| Primer        | Forward primer (5'-3')                                                                                                             | Position* | Reverse primer (5'-3')                                                                                                                                             | Position*   |
|---------------|------------------------------------------------------------------------------------------------------------------------------------|-----------|--------------------------------------------------------------------------------------------------------------------------------------------------------------------|-------------|
| Full-genome1  | ACGCTTAACAACAAAACCAAAGAAG                                                                                                          | 1–25      | TGAGCGATCTCAGCCTCYACTGATAG                                                                                                                                         | 2121–2096   |
| Full-genome2  | CTCCGTTCACTAGGCTTGAGTGGG                                                                                                           | 934–958   | GGACCAAGTTTGTCTGGTATCG                                                                                                                                             | 3412–3391   |
| Full-genome3  | CTATGGTCTGACATGTCTCTTCAG                                                                                                           | 3033–3056 | GACTTGGAATAGAAATGGGCCAAGT<br>C                                                                                                                                     | 5790–5765   |
| Full-genome4  | TGTCCCAACATCTTGAGGAACTC                                                                                                            | 5488–5511 | CGCATTGGTGGATACTGTAGA                                                                                                                                              | 7912–7892   |
| Full-genome5  | TACTAGCTCAAGGAGACAACCAGGT                                                                                                          | 7581–7605 | AGCTGCATGGCGCACCTCTTGATC                                                                                                                                           | 10249–10226 |
| Full-genome6  | CAGCTCAGGGGCTCTTATACTCAATC                                                                                                         | 9555–9580 | ACGCTTAACAATAAACAATAAAGAT                                                                                                                                          | 11925–11900 |
| Kpn_HamRz_HEP | <u>ATAGGTACCTGTTAAGCGTCTGATGA</u><br><u>GTCCGTGAGGACGAACTATAGGAA</u><br><u>AGGAATTCCTATAGTCACGCTTAACA</u><br>ACAAAACCAAAGAAGAAGCA* | 1–30      | <u>CGGCTGCAGCGCCCTCCCTTAGCCAT</u><br><u>CCGAGTGGACGTGCGTCCTCCTTCG</u><br><u>GATGCCCAGGTCGGACCGCGAGGAG</u><br><u>GTGGAGATGCCATGCCGACCCACGC</u><br>TTAACAATAAACAATA* | 11925–11905 |
| Pst_HdvRz_HEP |                                                                                                                                    |           |                                                                                                                                                                    |             |

Note that ribozyme sequences are underlined.

\*: The positions of the primer locations were defined based on the newly amplified genomic sequence of HEP using these primer sets.

Supplementary Table S9. Primers used for construction of helper plasmids

| Primer   | Forward primer (5'–3')    | Position* | Reverse primer (5'–3')      | Position*   |
|----------|---------------------------|-----------|-----------------------------|-------------|
| helper N | ATAGGTACCATGGATGCCGACAAG  | 67–85     | CGGCTGCAGTTATGAGTCACTCG     | 1423–1410   |
| helper P | ATAGGTACCATGAGCAAGATCTTTG | 1511–1529 | CGGCTGCAGTTAGCATGATGTGTAG   | 2408–2392   |
| helper G | ATAGGTACCATGGTTCCTCAGGTTC | 3318–3333 | CGGCTGCAGTCACAGTCTGGTCTCG   | 4892–4877   |
| helper L | ATAGGTACCATGCTGGATCCGGGA  | 5411–5425 | CGGCTGCAGTTACAAACAACACTGTAG | 11794–11779 |

\*: The positions of the primer locations were defined based on the newly amplified genomic sequence of HEP using these primer sets.

Supplemental Table S10. Primers used for construction of recombinant viruses.

| Primer           | Forward primer (5'–3')                | Position*   | Reverse primer (5'–3')                 | Position*   |
|------------------|---------------------------------------|-------------|----------------------------------------|-------------|
| HEP-10V_P_L115H  | AGATTCCACAAGATATGGTCACAG<br>ACCGTAGAG | 1850–1882   | TATCTTGTGGAATCTCTCTCCTGACCT<br>CATTTG  | 1864–1832   |
| HEP-10V_G_S15R   | CCCTGGAGACCTATTGACTTACACC<br>ATCTCAGC | 3411–3443   | AATAGGTCTCCAGGGACCAAGTTTGT<br>CTGGTAT  | 3425–3393   |
| HEP-10V_L_L2055E | TGGTCCGAGGACACCCCAGTGTTT<br>AAGAGGGTA | 11567–11599 | GGTGTCCCTCGGACCAGCTCCAAGATA<br>GATAGAT | 11581–11549 |
| HEP-30V_L_E753D  | GAGTTAGATAGCATATCGAGGAAT<br>GCACTCTCA | 7661–7693   | TATGCTATCTAACTCATAGAGAAGCC<br>CCTCTTG  | 7675–7643   |
| HEP-30V_G_V164E  | ATAACGGAGTCCTCGACCTACTGC<br>TCAACTAA  | 3858–3889   | CGAGGACTCCGTTATTCCTGAGCAAT<br>TTCCGCC  | 3872–3840   |
| HEP-30V_G_L183P  | GAGAATCCGAGACTAGGGACATCT<br>TGTGACATT | 3915–3947   | TAGTCTCGGATTCTCAGGCATCCAGA<br>TGGTGTA  | 3929–3897   |
| HEP-30V_G_A286V  | CTGGATGTACTAGAGTCCATCATG<br>ACCACCAAG | 4224–4256   | CTCTAGTACATCCAGACACTCCTCTC<br>TTTTCTTG | 4238–4205   |

\*: The positions of the primer locations were defined based on the newly amplified genomic sequence of HEP using these primer sets.

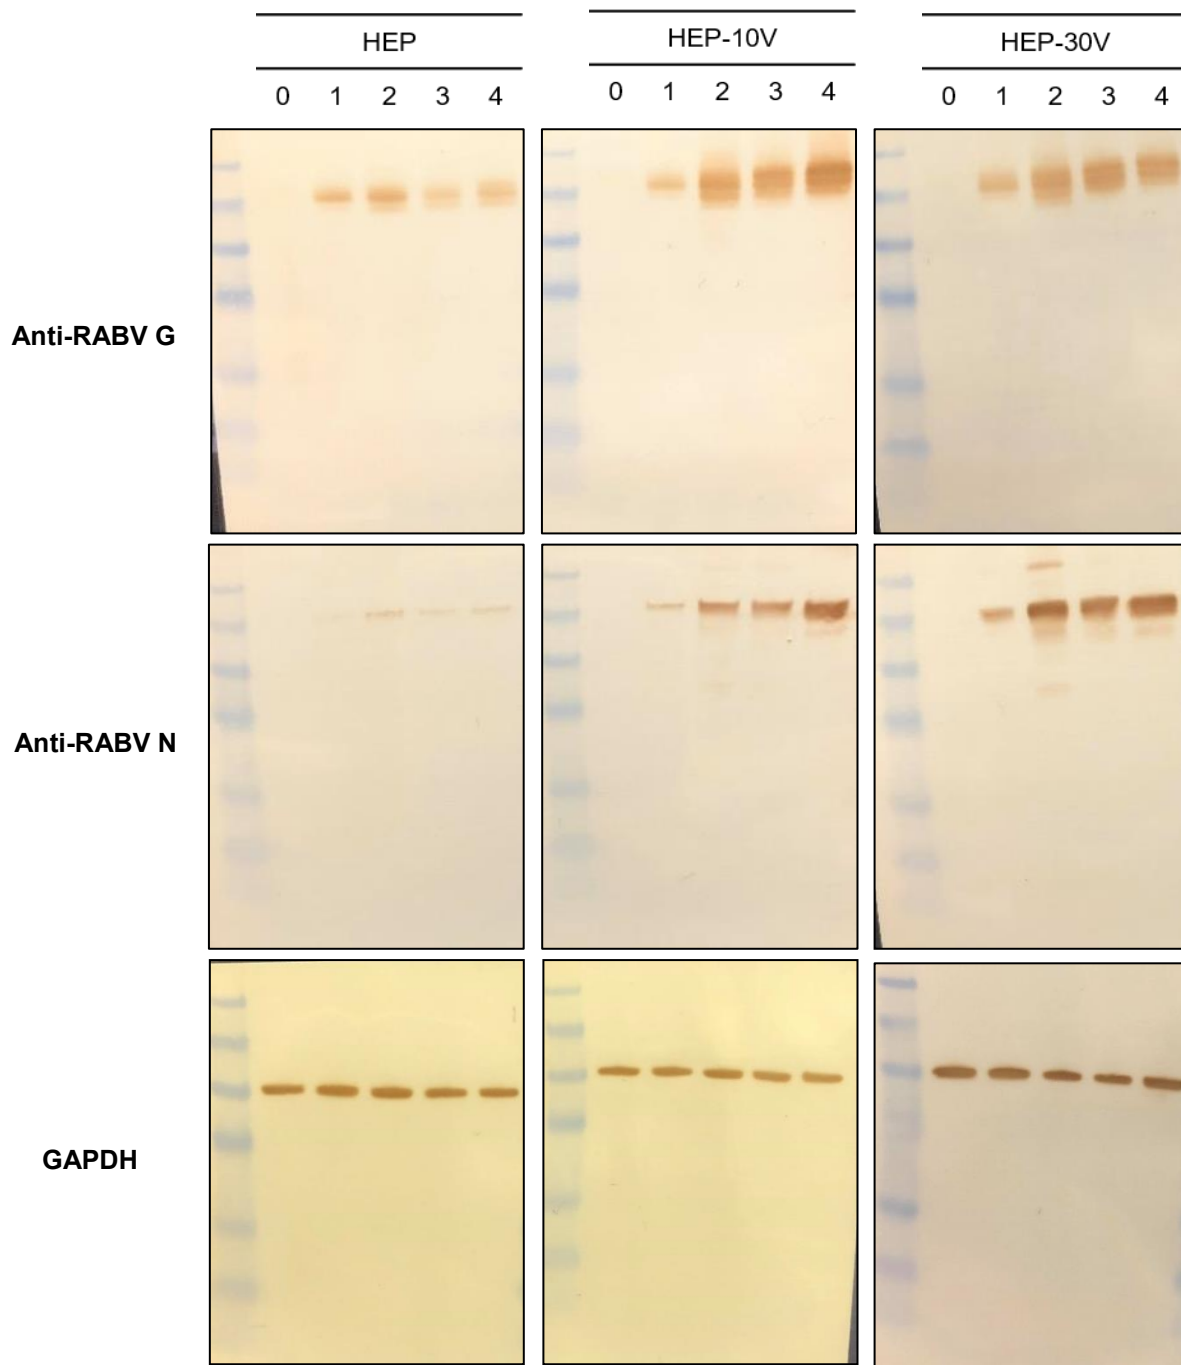

Supplemental Figure S1. Full uncropped Blot images for Fig.2(a)
